# Supplementary material for: Lifetime self-reported arthritis is associated with elevated levels of mental health burden: A multi-national cross sectional study across 46 low- and middle-income countries
Source: PubMed Central journal article supplement (PMC5541038; doi:10.1038/s41598-017-07688-6), 2017-08-02
Supplement: 41598_2017_7688_MOESM1_ESM.pdf [file 41598_2017_7688_MOESM1_ESM.pdf]

## Appendix 1 of ethical approval committees for the World health survey

### **Ethical approval**

Ethical approval was obtained from each of the following committees in the respective countries for the World Health Survey:

| <b>Country</b>     | <b>Ethical committee approving the study</b>                  |
|--------------------|---------------------------------------------------------------|
| Bangladesh         | Mitra and Associates                                          |
| Bosnia Herzegovina | The Federal Public Health Institute                           |
| Brazil             | Fundacao Oswaldo Cruz                                         |
| Burkina Faso       | Institut de Recherche en Sciences de la Santé                 |
| Chad               | Faculté des Sciences de la Santé, Univ N'Djamena              |
| China              | Centre for Health Statistics Information                      |
| Comoros            | Bureau Comorien de Conseil                                    |
| Congo              | Unité de recherche sur les systèmes de santé                  |
| Ivory Coast        | Ministère de la Santé                                         |
| Croatia            | The Croatian National Institute of Public Health              |
| Czech Republic     | Institute of Health Information and Statistics                |
| Dominican Republic | Centro de Estudios Sociales y Demográficos (CESDEM)           |
| Ecuador            | Fundación Ecuatoriana para la Salud y el Desarrollo (FESALUD) |
| Estonia            | Saar Poll Ltd.                                                |
| Ethiopia           | Department of Community Health, Jimma University              |
| Georgia            | Georgian State Medical Academy (GSMA)                         |
| Ghana              | Department of Community Health, Ghana Medical Sch             |
| Hungary            | Johan Bela National Centre for Epidemiology                   |
| India              | International Institute of Population Sciences                |
| Kazakhstan         | Kazakhstan School of Public Health (KSPH)                     |
| Kenya              | Central Bureau of Statistics                                  |
| Laos               | National Institute of Public Health, Ministry of Health       |
| Latvia             | The Health Promotion Center                                   |
| Malawi             | Centre for Social Research (CSR)                              |
| Malaysia           | Public Health Institute, Ministry of Health                   |
| Mali               | Cellule de Planification et de Statistique, (CPS)             |
| Mauritania         | Office Nationale de la Statistique (ONS)                      |
| Mauritius          | Mauritius Institute of Health                                 |
| Mexico             | Instituto Nacional de Salud Pública                           |

|              |                                                              |
|--------------|--------------------------------------------------------------|
| Morocco      | Ministère de la Santé                                        |
| Myanmar      | Department of Medical Research, Ministry of Health           |
| Namibia      | Ministry of Health                                           |
| Nepal        | ORG-MARG Nepal PVT.Ltd                                       |
| Pakistan     | Ministry of Health                                           |
| Paraguay     | Fac.de Ciencias Veterinarias, Univ. Nacional/DGEEC           |
| Philippines  | College of Medicine, University of the Philippines           |
| Russia       | Semashko Institute for Research on Social Hygiene,           |
| Senegal      | Direction Etudes, Recherche et Formation (DERF)              |
| Slovakia     | Environment,s.c., Centre of Biostatistics and Envi           |
| South Africa | Community Agency for Social Enquiry (CASE)                   |
| Sri Lanka    | Ministry of Health                                           |
| Swaziland    | Faculty of Health Sciences, Univ Swaziland                   |
| Tunisia      | Institut National de la Santé Publique                       |
| Ukraine      | Odessa State Medical University                              |
| Uruguay      | Centro de Estudios de Economia y Salud (CEES)                |
| Vietnam      | Ministry of Health                                           |
| Zambia       | School of Humanities & Social Sciences, University of Zambia |
| Zimbabwe     | Community Health, University of Zimbabwe                     |

**Web Appendix 2** Correlates of arthritis assessed by multivariable binary logistic regression analysis (Complete case analysis)

| Characteristic      | Overall<br>(N= <b>147,732</b> ) |             | Low-income<br>countries<br>(N=56,896) |             | Middle-income countries<br>(N=90,836) |             |
|---------------------|---------------------------------|-------------|---------------------------------------|-------------|---------------------------------------|-------------|
|                     | OR                              | 95%CI       | OR                                    | 95%CI       | OR                                    | 95%CI       |
| <b>Sex</b>          |                                 |             |                                       |             |                                       |             |
| Male                | 1.00                            |             | 1.00                                  |             | 1.00                                  |             |
| Female              | 1.65***                         | [1.53,1.77] | 1.68***                               | [1.48,1.90] | 1.64***                               | [1.51,1.79] |
| <b>Age (years)</b>  | 1.04***                         | [1.04,1.04] | 1.04***                               | [1.04,1.04] | 1.04***                               | [1.04,1.05] |
| <b>Education</b>    |                                 |             |                                       |             |                                       |             |
| No formal           | 1.00                            |             | 1.00                                  |             | 1.00                                  |             |
| ≤Primary            | 1.01                            | [0.91,1.12] | 1.06                                  | [0.93,1.21] | 0.89                                  | [0.77,1.04] |
| Secondary completed | 0.82**                          | [0.73,0.93] | 0.83*                                 | [0.69,1.00] | 0.75**                                | [0.63,0.89] |
| Tertiary completed  | 0.75***                         | [0.65,0.87] | 0.72**                                | [0.56,0.92] | 0.71***                               | [0.58,0.86] |
| <b>Wealth</b>       |                                 |             |                                       |             |                                       |             |
| Poorest             | 1.00                            |             | 1.00                                  |             | 1.00                                  |             |
| Poorer              | 1.07                            | [0.98,1.18] | 1.20*                                 | [1.04,1.39] | 0.96                                  | [0.85,1.08] |
| Middle              | 1.02                            | [0.93,1.13] | 1.09                                  | [0.93,1.27] | 0.96                                  | [0.85,1.07] |
| Richer              | 0.91                            | [0.83,1.01] | 0.96                                  | [0.83,1.12] | 0.85*                                 | [0.75,0.97] |
| Richest             | 0.87*                           | [0.78,0.98] | 0.94                                  | [0.78,1.12] | 0.81**                                | [0.70,0.95] |
| <b>Setting</b>      |                                 |             |                                       |             |                                       |             |
| Rural               | 1.00                            |             | 1.00                                  |             | 1.00                                  |             |
| Urban               | 0.89**                          | [0.83,0.97] | 0.86*                                 | [0.75,0.99] | 0.94                                  | [0.85,1.03] |
| <b>Smoking</b>      |                                 |             |                                       |             |                                       |             |
| No                  | 1.00                            |             | 1.00                                  |             | 1.00                                  |             |

|                               |         |             |         |             |         |             |
|-------------------------------|---------|-------------|---------|-------------|---------|-------------|
| Yes                           | 1.24*** | [1.14,1.34] | 1.26**  | [1.09,1.44] | 1.24*** | [1.13,1.35] |
| <b>Alcohol consumption</b>    |         |             |         |             |         |             |
| Never/non-heavy               | 1.00    |             | 1.00    |             | 1.00    |             |
| Infrequent heavy              | 0.93    | [0.80,1.07] | 1.10    | [0.79,1.55] | 0.89    | [0.76,1.05] |
| Frequent heavy                | 0.86    | [0.65,1.13] | 1.18    | [0.81,1.71] | 0.72    | [0.49,1.06] |
| <b>Angina</b>                 | 2.72*** | [2.51,2.96] | 2.64*** | [2.31,3.01] | 2.78*** | [2.52,3.07] |
| <b>Asthma</b>                 | 1.52*** | [1.34,1.74] | 1.56*** | [1.24,1.96] | 1.51*** | [1.29,1.76] |
| <b>Diabetes</b>               | 1.57*** | [1.32,1.88] | 1.99*** | [1.38,2.87] | 1.41*** | [1.16,1.71] |
| <b>BMI (kg/m<sup>2</sup>)</b> |         |             |         |             |         |             |
| 18.5-24.9                     | 1.00    |             | 1.00    |             | 1.00    |             |
| 25.0-29.9                     | 1.19*** | [1.09,1.30] | 1.10    | [0.92,1.31] | 1.26*** | [1.15,1.39] |
| ≥30.0                         | 1.49*** | [1.34,1.66] | 1.12    | [0.89,1.41] | 1.71*** | [1.51,1.93] |
| <18.5                         | 0.93    | [0.85,1.03] | 0.91    | [0.81,1.03] | 0.95    | [0.81,1.11] |

Abbreviation: OR odds ratio; CI confidence interval; BMI Body mass index

The models are adjusted for all variables in the table and country.

Turkey is not included in the regression analyses as it lacked information on education.

\* p<0.05, \*\* p<0.01, \*\*\* p<0.001

**Web Appendix 3** The association between arthritis and mental health outcomes estimated by multinomial and binary logistic regression (Complete case analysis)

| Outcome                                | Overall   |             | Low-income countries |             | Middle-income countries |             |
|----------------------------------------|-----------|-------------|----------------------|-------------|-------------------------|-------------|
|                                        | OR        | 95%CI       | OR                   | 95%CI       | OR                      | 95%CI       |
| <i>Multinomial logistic regression</i> |           |             |                      |             |                         |             |
| Psychosis                              | N=146,728 |             | N=56,248             |             | N=90,480                |             |
| Symptom (-) Diagnosis (-)              | 1.00      |             | 1.00                 |             | 1.00                    |             |
| Symptom (+) Diagnosis (-)              | 1.93***   | [1.76,2.10] | 1.83***              | [1.59,2.11] | 2.01***                 | [1.79,2.26] |
| Diagnosis (+)                          | 2.64***   | [2.04,3.41] | 2.56***              | [1.76,3.72] | 2.80***                 | [2.01,3.89] |
| Depression type                        | N=146,294 |             | N=56,575             |             | N=89,719                |             |
| No depression                          | 1.00      |             | 1.00                 |             | 1.00                    |             |
| Subsyndromal depression                | 2.11***   | [1.75,2.55] | 2.13***              | [1.63,2.79] | 2.08***                 | [1.62,2.68] |
| Brief depressive episode               | 2.29***   | [1.93,2.70] | 2.23***              | [1.74,2.86] | 2.35***                 | [1.89,2.93] |
| Depressive episode                     | 2.56***   | [2.28,2.88] | 2.54***              | [2.11,3.06] | 2.63***                 | [2.29,3.02] |
| <i>Binary logistic regression</i>      |           |             |                      |             |                         |             |
| Anxiety <sup>a</sup>                   | N=145,458 |             | N=56,691             |             | N=88,767                |             |
|                                        | 1.90***   | [1.72,2.10] | 1.94***              | [1.65,2.28] | 1.86***                 | [1.64,2.11] |
| Sleep problems                         | N=147,506 |             | N=56,738             |             | N=90,768                |             |
|                                        | 2.40***   | [2.15,2.68] | 2.57***              | [2.10,3.14] | 2.29***                 | [2.02,2.61] |
| Perceived stress <sup>b</sup>          | N=138,512 |             | N=53,848             |             | N=84,664                |             |
|                                        | 1.46***   | [1.34,1.60] | 1.45***              | [1.29,1.63] | 1.46***                 | [1.30,1.63] |

Abbreviation: OR odds ratio; CI confidence interval

All models are adjusted for sex, age, education, wealth, setting, smoking, alcohol consumption, angina, asthma, diabetes, obesity, and country.

Turkey is not included in the regression analyses as it lacked information on education.

<sup>a</sup> Morocco is not included as it lacked information on anxiety.

<sup>b</sup> Brazil, Hungary, and Zimbabwe are not included as they lacked information on perceived stress.

\*\*\* p<0.001
